# Supplementary material for: CO oxidation on metal-free nitrogen-doped carbon nanotubes and the related structure–reactivity relationships
Source: Royal Society of Chemistry journal article supplement (doi:10.1039/c2jm33490a), 2012-01-01
Supplement: c2jm33490a.pdf [file c2jm33490a.pdf]

**Supplementary Information for:**

**CO oxidation on metal-free nitrogen-doped  
carbon nanotubes and the related  
structure-reactivity relationships**

Xingbang Hu\*, Youting Wu, and Zhibing Zhang

School of Chemistry and Chemical Engineering, and National Engineering Research  
Center for Organic Pollution Control and Resource, Nanjing University, Nanjing  
210093, P. R. China

Index

1. The optimized structures of different states in pathway B, C, E and F
2. The IRC analysis results
3. The adsorbing potential energy curve

## 1. The optimized structures of different states in pathway B, C, E and

### F

Table S1. The optimized structures of different states in pathway B and C.

| Bond Length<br>in Å                      | Rea-B                                                                             | TS1-B                                                                             | Int-B                                                                             | TS2-B                                                                               | Pro-B                                                                               |
|------------------------------------------|-----------------------------------------------------------------------------------|-----------------------------------------------------------------------------------|-----------------------------------------------------------------------------------|-------------------------------------------------------------------------------------|-------------------------------------------------------------------------------------|
|                                          | 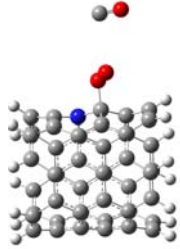 |  |  |  |  |
| C <sub>NCNT</sub> -O <sub>oxygen</sub>   | 1.533                                                                             | 1.497                                                                             | 1.453                                                                             | 1.452                                                                               | 1.223                                                                               |
| O <sub>oxygen</sub> -O <sub>oxygen</sub> | 1.316                                                                             | 1.384                                                                             | 1.478                                                                             | 1.484                                                                               | 3.050                                                                               |
| C <sub>CO</sub> -O <sub>oxygen</sub>     | 3.067                                                                             | 1.735                                                                             | 1.343                                                                             | 1.399                                                                               | 1.170                                                                               |
| C <sub>CO</sub> -O <sub>CO</sub>         | 1.139                                                                             | 1.157                                                                             | 1.193                                                                             | 1.182                                                                               | 1.169                                                                               |

  

| Bond Length<br>in Å                      | Rea-C                                                                               | TS1-C                                                                               | Int-C                                                                               | TS2-C                                                                                 | Pro-C                                                                                 |
|------------------------------------------|-------------------------------------------------------------------------------------|-------------------------------------------------------------------------------------|-------------------------------------------------------------------------------------|---------------------------------------------------------------------------------------|---------------------------------------------------------------------------------------|
|                                          |  |  |  |  |  |
| C <sub>NCNT</sub> -O <sub>oxygen</sub>   | 1.533                                                                               | 1.467                                                                               | 1.459                                                                               | 1.459                                                                                 | 1.231                                                                                 |
| O <sub>oxygen</sub> -O <sub>oxygen</sub> | 1.316                                                                               | 1.397                                                                               | 1.478                                                                               | 1.504                                                                                 | 3.093                                                                                 |
| C <sub>CO</sub> -O <sub>oxygen</sub>     | 3.050                                                                               | 1.743                                                                               | 1.343                                                                               | 1.389                                                                                 | 1.170                                                                                 |
| C <sub>CO</sub> -O <sub>CO</sub>         | 1.139                                                                               | 1.159                                                                               | 1.192                                                                               | 1.185                                                                                 | 1.169                                                                                 |

Table S2. The optimized structures of different states in pathway E and F.

| Bond Length<br>in Å                 | Rea-E                                                                             | TS1-E                                                                             | Int-E                                                                             | TS2-E                                                                              | Pro-E                                                                               |
|-------------------------------------|-----------------------------------------------------------------------------------|-----------------------------------------------------------------------------------|-----------------------------------------------------------------------------------|------------------------------------------------------------------------------------|-------------------------------------------------------------------------------------|
|                                     |  |  |  |  |  |
| $C_{\text{NCNT}}-O_{\text{oxygen}}$ | 1.220                                                                             | 1.375                                                                             | 1.534                                                                             | 1.609                                                                              | 3.985                                                                               |
| $C_{\text{CO}}-O_{\text{oxygen}}$   | 2.953                                                                             | 1.866                                                                             | 1.329                                                                             | 1.311                                                                              | 1.169                                                                               |
| $C_{\text{CO}}-O_{\text{CO}}$       | 1.139                                                                             | 1.159                                                                             | 1.183                                                                             | 1.185                                                                              | 1.169                                                                               |
| Bond Length<br>in Å                 | Rea-F                                                                             | TS1-F                                                                             | Int-F                                                                             | TS2-F                                                                              | Pro-F                                                                               |
|                                     |  |  |  |  |  |
| $C_{\text{NCNT}}-O_{\text{oxygen}}$ | 1.221                                                                             | 1.350                                                                             | 1.478                                                                             | 1.491                                                                              | 3.985                                                                               |
| $C_{\text{CO}}-O_{\text{oxygen}}$   | 2.951                                                                             | 1.847                                                                             | 1.339                                                                             | 1.336                                                                              | 1.169                                                                               |
| $C_{\text{CO}}-O_{\text{CO}}$       | 1.139                                                                             | 1.161                                                                             | 1.192                                                                             | 1.193                                                                              | 1.169                                                                               |

## 2. The IRC analysis results.

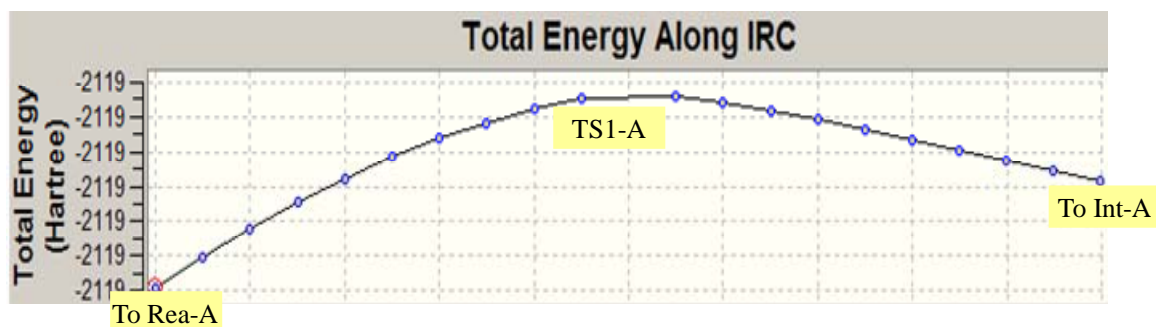

| Bond Length                                                                       | To Rea-A                                                                          | TS1-A                                                                               | To Int-A |
|-----------------------------------------------------------------------------------|-----------------------------------------------------------------------------------|-------------------------------------------------------------------------------------|----------|
| 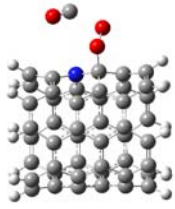 |  |  |          |
| C <sub>NCNT</sub> -O <sub>oxygen</sub>                                            | 1.487                                                                             | 1.466                                                                               | 1.452    |
| O <sub>oxygen</sub> -O <sub>oxygen</sub>                                          | 1.341                                                                             | 1.390                                                                               | 1.461    |
| C <sub>CO</sub> -O <sub>oxygen</sub>                                              | 2.014                                                                             | 1.770                                                                               | 1.525    |
| C <sub>CO</sub> -O <sub>CO</sub>                                                  | 1.145                                                                             | 1.155                                                                               | 1.178    |

Fig. S1. The IRC analysis result of TS1-A

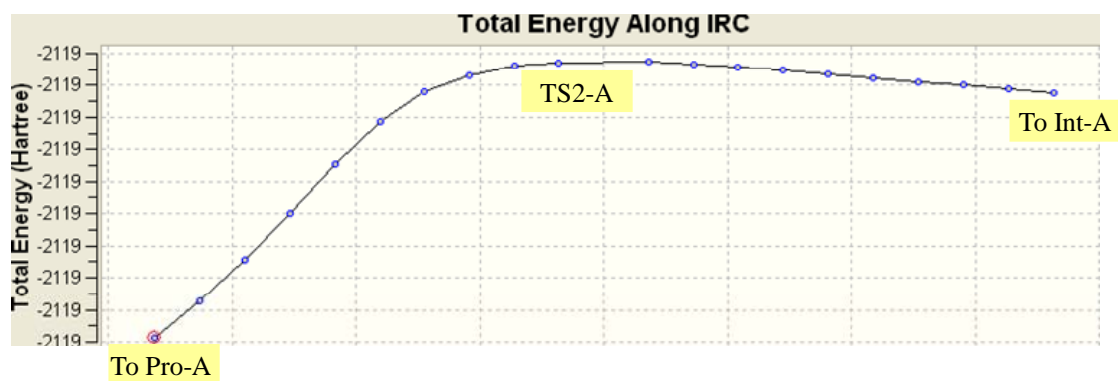

| Bond Length                              | To Int-A                                                                          | TS2-A                                                                             | To Pro-A                                                                            |
|------------------------------------------|-----------------------------------------------------------------------------------|-----------------------------------------------------------------------------------|-------------------------------------------------------------------------------------|
|                                          | 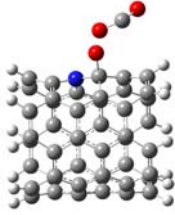 |  |  |
| C <sub>NCNT</sub> -O <sub>oxygen</sub>   | 1.437                                                                             | 1.434                                                                             | 1.352                                                                               |
| O <sub>oxygen</sub> -O <sub>oxygen</sub> | 1.500                                                                             | 1.518                                                                             | 1.887                                                                               |
| C <sub>CO</sub> -O <sub>oxygen</sub>     | 1.348                                                                             | 1.382                                                                             | 1.168                                                                               |
| C <sub>CO</sub> -O <sub>CO</sub>         | 1.190                                                                             | 1.187                                                                             | 1.170                                                                               |
| ∠COO                                     | 102.8                                                                             | 105.3                                                                             | 106.2                                                                               |
| ∠OCOO                                    | 150.7                                                                             | 98.5                                                                              | 60.4                                                                                |

Fig. S2. The IRC analysis result of TS2-A

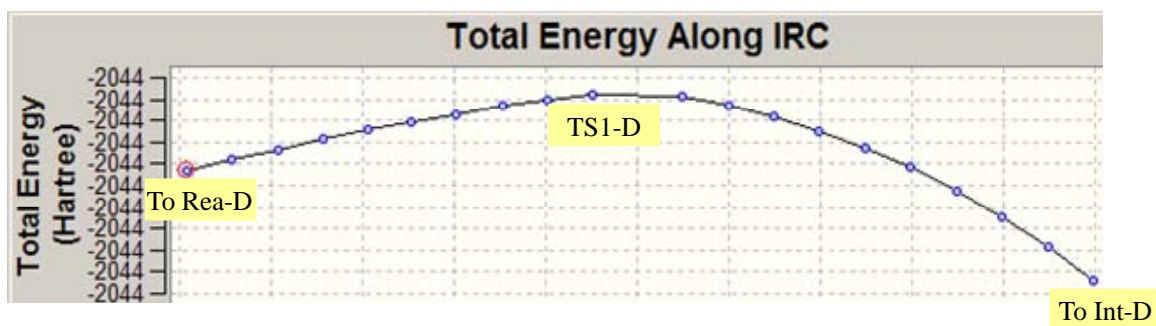

| Bond Length                            | To Rea-D                                                                          | TS1-D                                                                              | To Int-D                                                                            |
|----------------------------------------|-----------------------------------------------------------------------------------|------------------------------------------------------------------------------------|-------------------------------------------------------------------------------------|
|                                        | 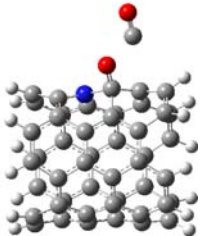 |  |  |
| C <sub>NCNT</sub> -O <sub>oxygen</sub> | 1.285                                                                             | 1.311                                                                              | 1.354                                                                               |
| C <sub>CO</sub> -O <sub>oxygen</sub>   | 2.109                                                                             | 1.944                                                                              | 1.751                                                                               |
| C <sub>CO</sub> -O <sub>CO</sub>       | 1.149                                                                             | 1.158                                                                              | 1.171                                                                               |

Fig. S3. The IRC analysis result of TS1-D

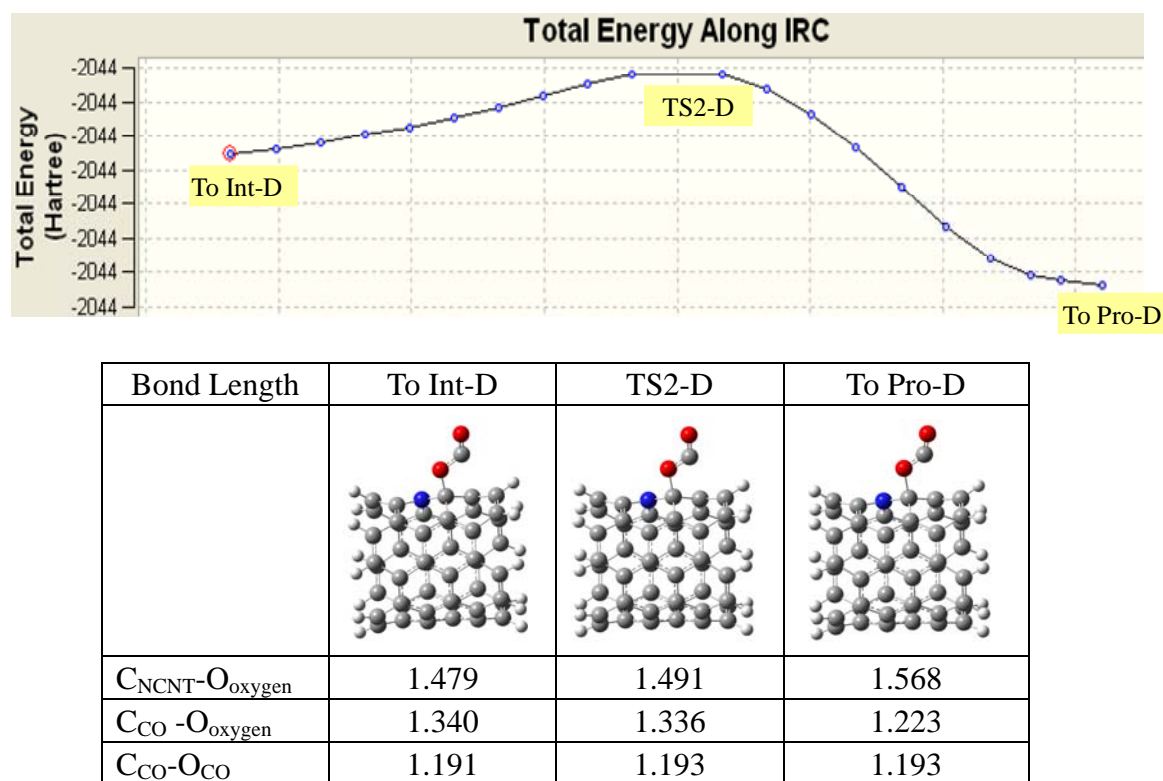

Fig. S4. The IRC analysis result of TS2-D

### 3. The adsorbing potential energy curve.

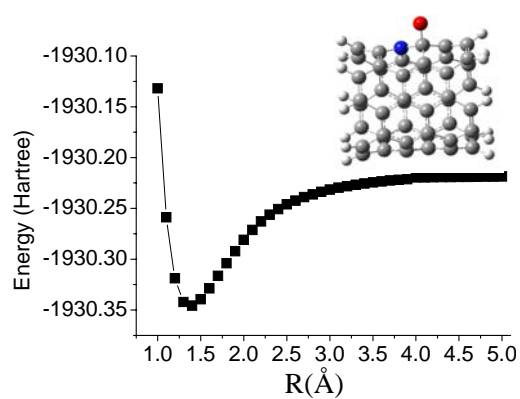

Fig. S5. The adsorbing potential energy curve of NCNT(4,4)-8.0...O.
